# Supplementary material for: TFIIH is an elongation factor of RNA polymerase I
Source: PubMed Central journal article supplement — Nucleic Acids Res. 2011 Sep 28;40(2):650–9. doi: 10.1093/nar/gkr746 (PMC3258137; doi:10.1093/nar/gkr746), 2011-09-28
Supplement: supp_gkr746_nar-01075-x-2011-File003.pdf [file supp_gkr746_nar-01075-x-2011-File003.pdf]

S1

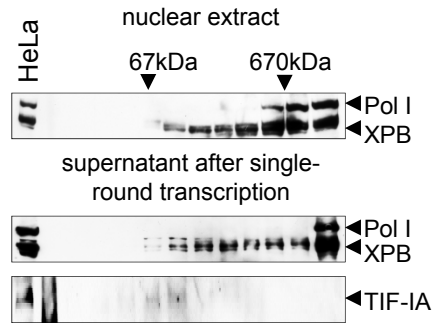

### **TFIIH sediments with RNA polymerase I after single-round transcription**

Nuclear extract or supernatants from single-round transcriptions with immobilized complexes were analysed for sedimentation properties on 12.5-30% glycerol gradients. Whereas TFIIH in nuclear extracts is found in complexes of different sizes, TFIIH sediments after RNA polymerase I transcription in the bottom fraction where RNA polymerase I is detectable. TIF IA sediments after transcription with a molecular size of ca 100kDa.

### **Glycerol-gradient centrifugation**

4 ml of a linear 12.5-30% glycerol gradient in buffer AM100 was casted with a gradient maker and overlaid with the indicated probes in 10% glycerol, subject to centrifugation in a Beckman centrifuge and a SW50 rotor for 14h 45000rpm. Twelve fractions were harvested from the top to the bottom and analysed after TCA precipitation on western blots.

S2

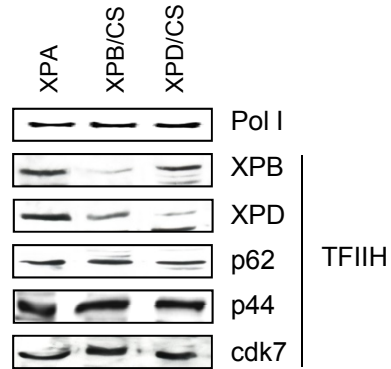

**XPB and XPD subunits are reduced in CS nuclear extracts**  
Western blot analysis of the stoichiometry of TFIIH subunits in nuclear extracts of XPA(wtTFIIH), XPB/CS and XPD/CS cells.

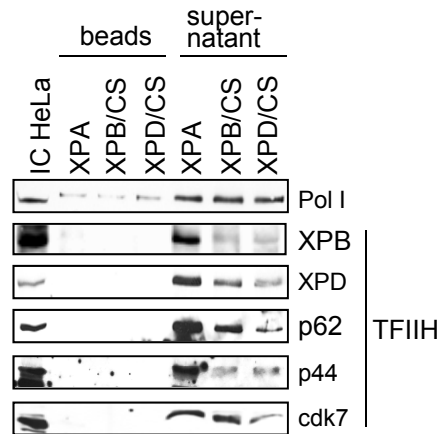

**RNA polymerase I does not stall at promoter-proximal sequences when TFIIH is reduced.** Western blot analysis of immobilized complexes formed with the indicated nuclear extracts and challenged by the addition of nucleotides. Transcription was restricted to a single round by addition of sarcosyl and unspecific DNA.

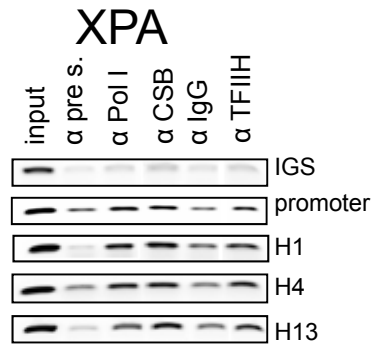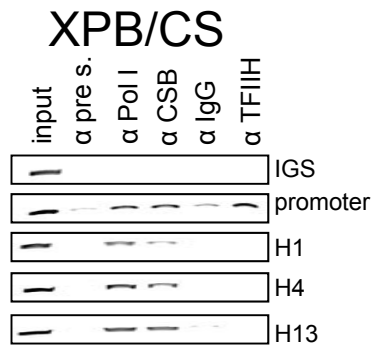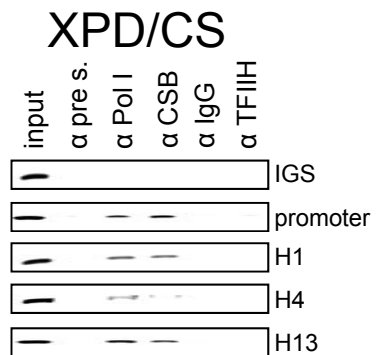

**CS-mutation in TFIIH is followed by a reduced binding of TFIIH to the rDNA.** Semi-quantitative PCR analysis of chromatin-immunoprecipitation experiments performed with the indicated antibodies from chromatin of cell lines as stated above. TFIIH binds the rDNA promoter in XPB/CS cells, but fails to bind to gene-internal sequences. There is no binding of TFIIH in XPD/CS cells to the rDNA detectable

S4

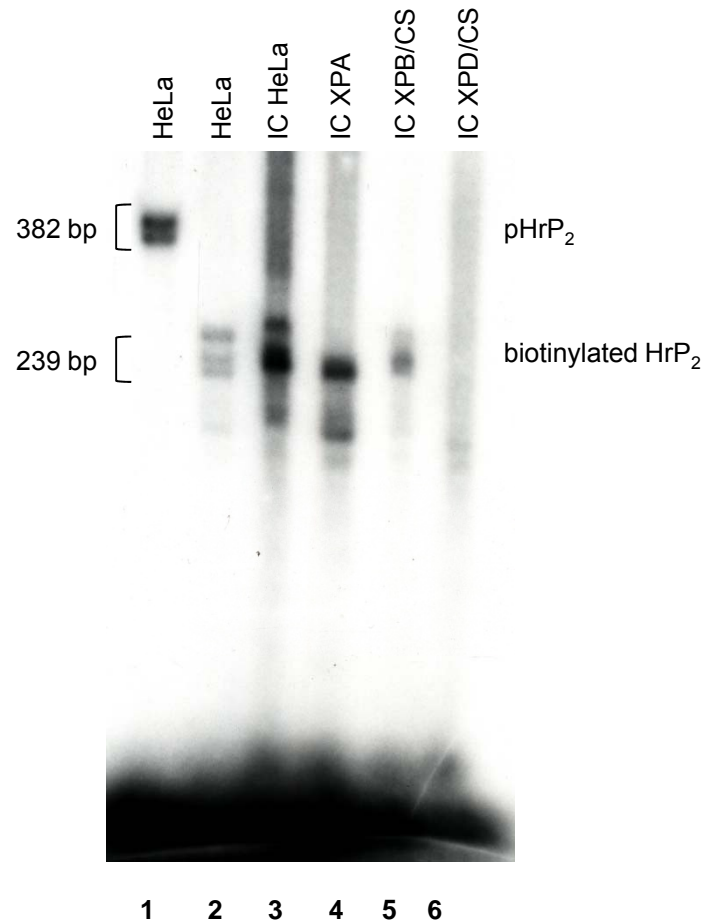

***In vitro* transcription analysis with immobilized complexes does not unravel short or incomplete transcripts.** Picture of the autoradiograph shown in figure 5C. Lane 1. Transcription with HeLa nuclear extract and pHrP<sub>2</sub> template. Lane 2. Transcription with HeLa nuclear extract and biotinylated HrP<sub>2</sub> PCR product as template. Lanes 3-6 single round transcription of immobilized complexes derived of nuclear extracts as stated above.
